# Supplementary material
Source: Springer Nature journal article supplement (https://www.springermedizin.de/resource/supplementary/12985_2010_926_MOESM7_ESM.pdf/9608754)

**pH- 4 (A)**

**pH-7.3 (B)**

**pH-12 (C)**

**Native virion  
particle**

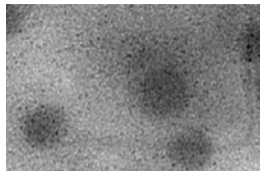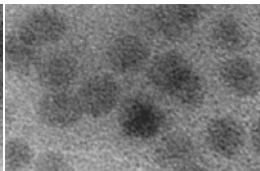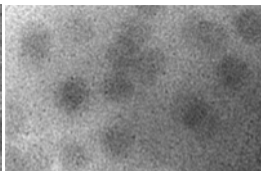

**VLP containing  
AmCPV S1 and  
S3**

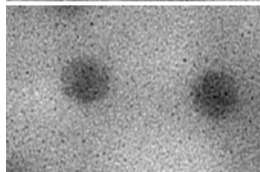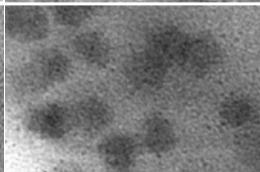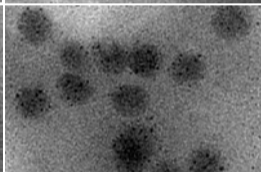

**VLP containing  
AmCPV S3**

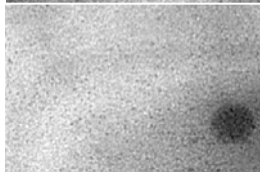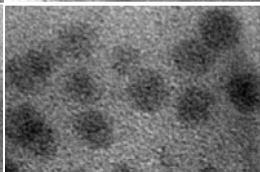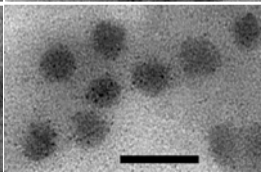

Supplement: MOESM7 [file 9608754]
